# Supplementary material for: Advance Consent for participation in Acute Stroke Trials (ACTION): protocol for a feasibility study
Source: HighWire-hosted journal article supplement (doi:10.1136/svn-2023-003029), 2024-10-02
Supplement: svn-2023-003029supp003_data_supplement.pdf [file svn-2023-003029supp003_data_supplement.pdf]

### Staff Questionnaire

1. What is your role at the Ottawa Hospital?
  - a. Physician
  - b. Nurse
  - c. Research Coordinator
  - d. Other
2. Do you work in the:
  - a. Stroke Prevention Clinic
  - b. Emergency Department
  - c. Neurovascular Unit (aka Acute stroke team)
  - d. Other
3. What was your role in relation to the patient enrolled in this feasibility study.
  - a. I screened and signposted a patient to discuss advance consent with the study coordinator
  - b. I discussed advance consent with a patient
  - c. I enrolled a patient who had provided advance consent into an acute stroke trial
4. Did any aspect of advance consent cause delays in the ordinary flow of clinical care?
  - a. Many delays
  - b. Some delays
  - c. No delays
5. If respondent answered a or b, ask: In what way did advance consent cause delays
  - a. Write In here
6. For those who work in Stroke Prevention Clinic, how strongly do you agree with the following: I would be willing to incorporate asking for trial-specific advance consent into my routine interactions with patients during Stroke Prevention Clinic consults.
  - a. Strongly agree
  - b. Agree
  - c. Neither agree nor disagree
  - d. Disagree
  - e. Strongly disagree
7. For those who work in the Emergency Department / NVU, how strongly do you agree with the following: I would be willing to enroll patients into an acute stroke clinical trial using advance consent.
  - a. Strongly agree
  - b. Agree
  - c. Neither agree nor disagree
  - d. Disagree
  - e. Strongly disagree
8. Do you have any comments or thoughts about your experiences with advance consent?
  - a. (free text)

Version Date: June 1, 2023
